# Supplementary material for: Evaluation of Trace Element and Metal Accumulation and Edibility Risk Associated with Consumption of Labeo umbratus from the Vaal Dam, South Africa
Source: MDPI journal article supplement (doi:10.3390/ijerph14070678), 2017-06-23
Supplement: s1 [file s1]

Table S1: Element concentrations in DOLT-5 certified by NRCC and as detected with TXRF: mean  $\pm$  SD of nine measurements and mean accuracy all values in mg/kg dw.

| Element | NRCC<br>(mg/kg dw) $\pm$ SD | Measured Values<br>(mg/kg dw) $\pm$ SD | Accuracy (%) |
|---------|-----------------------------|----------------------------------------|--------------|
| As      | 34.6 $\pm$ 2.4              | 30.7 $\pm$ 0.6                         | 88.7         |
| Cu      | 35.0 $\pm$ 2.4              | 34.1 $\pm$ 0.8                         | 97.4         |
| Fe      | 1070 $\pm$ 80               | 1022 $\pm$ 18                          | 95.5         |
| Mn      | 8.91 $\pm$ 0.70             | 8.2 $\pm$ 0.5                          | 92.0         |
| Se      | 8.3 $\pm$ 1.8               | 7.0 $\pm$ 0.4                          | 84.3         |
| Sr      | 3.73 $\pm$ 0.26             | 4.0 $\pm$ 0.3                          | 107.2        |
| Zn      | 105.3 $\pm$ 5.4             | 107.2 $\pm$ 5.5                        | 101.8        |
